# Supplementary material for: Z-Ajoene Inhibits Growth of Colon Cancer by Promotion of CK1α Dependent β-Catenin Phosphorylation
Source: Molecules. 2020 Feb 6;25(3):703. doi: 10.3390/molecules25030703 (PMC7037095; doi:10.3390/molecules25030703)
Supplement: Supplementary file 1 [file molecules-25-00703-s001.zip › revised Supplementary figure caption_Fig.S1-Ryu.pdf]

**Figure caption (Supplementary material, Figure S1)**

**Figure S1.** Effects of Z-ajoene on Wnt/ $\beta$ -catenin pathway in Wnt3a-activated HEK293 reporter cells. **(a)** The levels of  $\beta$ -catenin were detected by Western blotting in HEK293 reporter (TOPFlash) cells treated with Z-ajoene in the presence of Wnt3a-CM for 15 h. Images are representatives of three independent experiments with similar results. **(b)** mRNA levels of  $\beta$ -catenin were measured by RT-PCR in HEK293 reporter (TOPFlash) cells treated with Z-ajoene in the presence of Wnt3a-CM for 15 h. **(c)** HEK293 reporter (TOPFlash) cells and control (FOPFlash) cells were incubated with Z-ajoene in the presence of LiCl (GSK3 $\beta$  inhibitor). After 15 h incubation, luciferase activity was determined and expressed as relative TOPFlash activity compared to vehicle-treated cells. The values are presented as the mean  $\pm$  S.D. of three independent experiments. \* $p < 0.05$  indicates a significant difference compared to LiCl alone. **(d)** The levels of phosphorylated  $\beta$ -catenin (p- $\beta$ -catenin) were assessed in HEK293 reporter (TOPFlash) cells treated with Z-ajoene (10  $\mu$ M) in the presence of MG132 (proteasome inhibitor, 10  $\mu$ M) and/or Wnt3a-CM for 15 h. Images are representatives of three independent experiments with similar results. **(e)** HEK293 reporter (TOPFlash) cells and control (FOPFlash) cells were pre-treated with D4476 for 1 h, then incubated with Z-ajoene in the presence of Wnt3a-CM for 15 h. The relative luciferase activity was expressed as the relative TOPFlash activity compared to vehicle treated cells. The values are presented as the mean  $\pm$  S.D. of three independent experiments. \* $p < 0.05$  indicates a significant difference from Z-ajoene treatment in presence of Wnt3a-CM.
